# Supplementary material
Source: HighWire-hosted journal article supplement (https://qdcxjkg.com/highwire/filestream/129986/field_highwire_adjunct_files/1/ERJ-01485-2015_figE2.pdf)

Figure E2

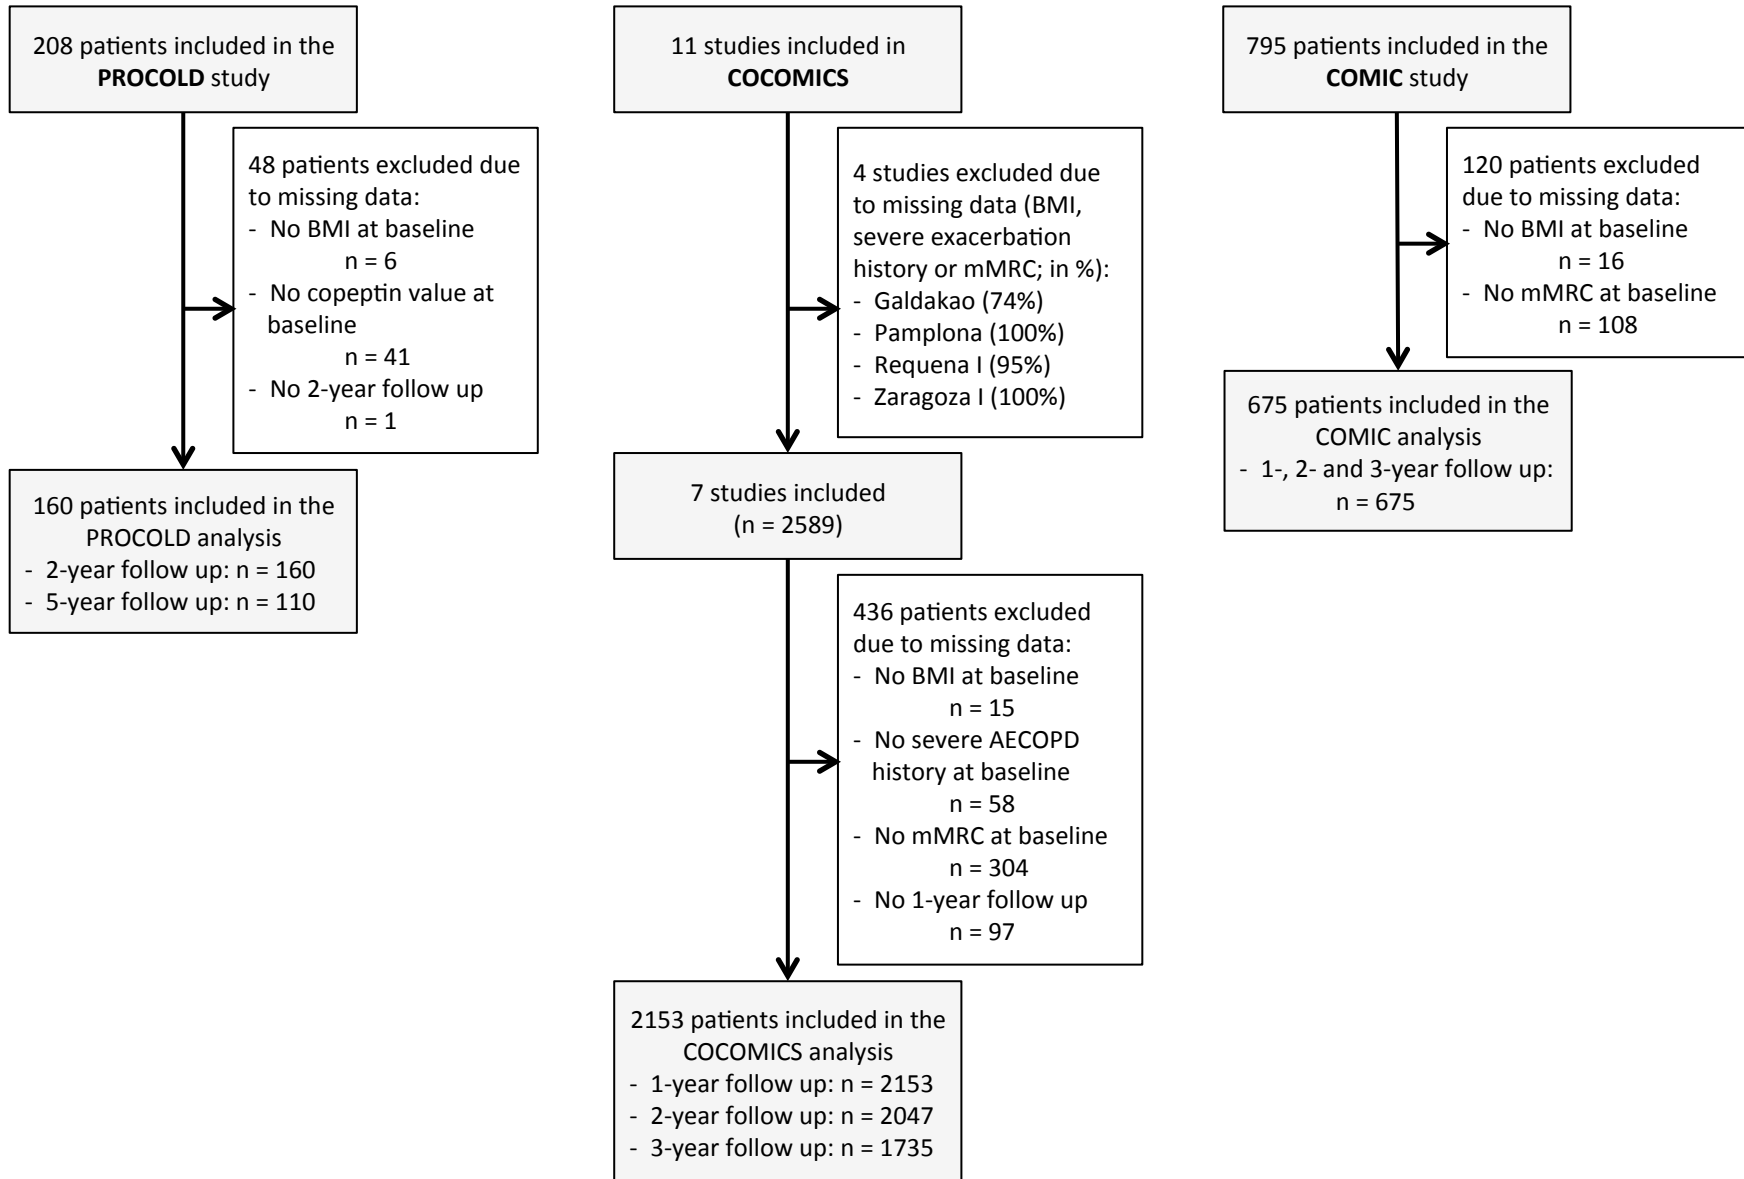

Supplement: ERJ-01485-2015_figE2.pdf [file ERJ-01485-2015_figE2.pdf]
